# Supplementary material for: Cyclophilin A Promotes Osteoblast Differentiation by Regulating Runx2
Source: MDPI journal article supplement (doi:10.3390/ijms23169244), 2022-08-17
Supplement: s1 [file s1]

## Supplementary materials

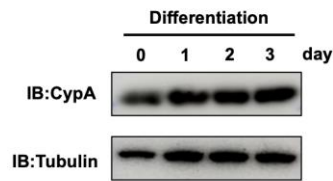

**Supplementary Figure S1.** CypA is ubiquitously expressed during osteoblasts differentiation. C2C12 cells were maintained differentiation medium (containing 2% FBS) treated with BMP4 for 72h. Cell lysates were harvested indicated time.

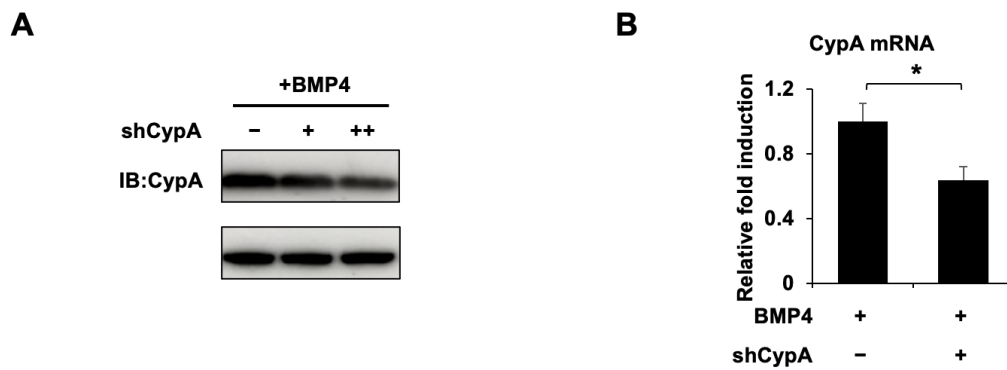

**Supplementary Figure S2.** Knockdown of CypA significantly suppressed the endogenous CypA expression. C2C12 cells were cultured in DMEM (containing 10% FBS) medium and transfected with empty vector or increasing amounts of shCypA plasmid using PEI transfection reagent. After 24h, cells were removed 10% FBS containing DMEM and maintained differentiation medium (including 2% FBS) treated with BMP4 for 48h.
